# Supplementary material
Source: Royal Society of Chemistry journal article supplement (doi:10.1039/d6ta00746e)
Supplement: d6ta00746e1.pdf [file d6ta00746e1.pdf]

**Supporting Information**

**Pressure–Temperature Driven Phase Transition and Optoelectronic Improvement  
in Lead-Free Hybrid Perovskite MASnI<sub>3</sub>**

*Yongpeng Tang<sup>1§\*</sup>, Kenta Nakahara<sup>1</sup>, Qing Wang<sup>1</sup>, Souta Inoue<sup>2</sup>, Tomoki Iio<sup>2</sup>, Reo*

*Miyazaki<sup>2</sup>, Masafumi Matsushita<sup>2\*</sup>, Reina Utsumi<sup>3</sup>, Yuki nakahira<sup>3</sup>, Hiroyuki Saitoh<sup>3</sup>,*

*Toru Shinmei<sup>4</sup>, Satoshi Ikubo<sup>1\*</sup>*

<sup>1</sup> Department of Advanced Materials Science and Engineering, Faculty of Engineering Sciences, Kyushu University, Kasuga-koen 6-1, Kasuga, Fukuoka, 816-8580, Japan

<sup>2</sup> Department of Mechanical Engineering, Ehime University, 3-Bunkyocho, Matsuyama 790-8577, Japan

<sup>3</sup> National Institutes for Quantum Science and Technology, 1-1-1 Kouto, Sayo, Hyogo 679-5148, Japan

<sup>4</sup> Geodynamics Research Center, Ehime University, 2-Bunkyocho, Matsuyama 790-8577, Japan

\* Corresponding author

Department of Advanced Materials Science and Engineering

Faculty of Engineering Sciences

Kyushu University

Kasuga-koen 6-1, Kasuga, Fukuoka, 816-8580, JAPAN

TEL/FAX: 092-583-7943

Email address: [iikubo.satoshi.472@m.kyushu-u.ac.jp](mailto:iikubo.satoshi.472@m.kyushu-u.ac.jp)

[y\\_tang@mat.shimane-u.ac.jp](mailto:y_tang@mat.shimane-u.ac.jp)

Department of Mechanical Engineering

Ehime University

3-Bunkyocho, Matsuyama 790-8577, Japan

Email address: [matsushita.masafumi.me@ehime-u.ac.jp](mailto:matsushita.masafumi.me@ehime-u.ac.jp)

§Present address: Faculty of materials for energy, Shimane University, Matsue 690-8504, Japan

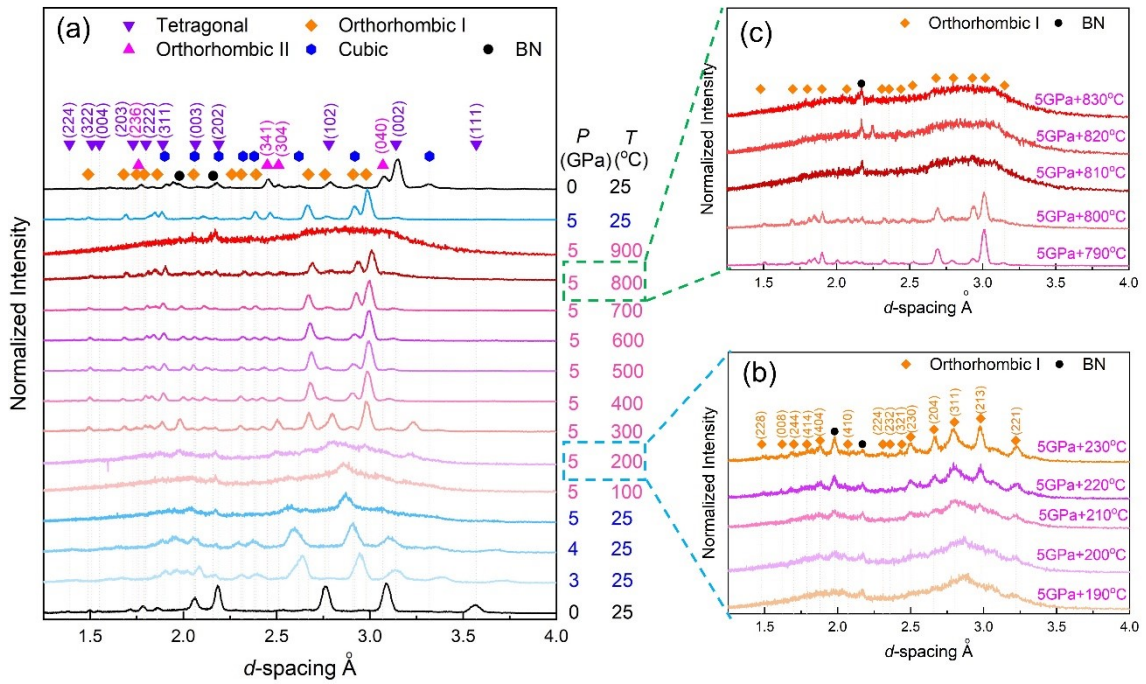

Fig. S1 X-ray profiles of  $\text{MASnI}_3$  under processing under high-pressure and high-temperature conditions. *In situ* X-ray acquisition was performed under applied pressure to 5 GPa, during heating to 900 °C and after cooling to room temperature. X-ray profiles before loading and after loading are also included.

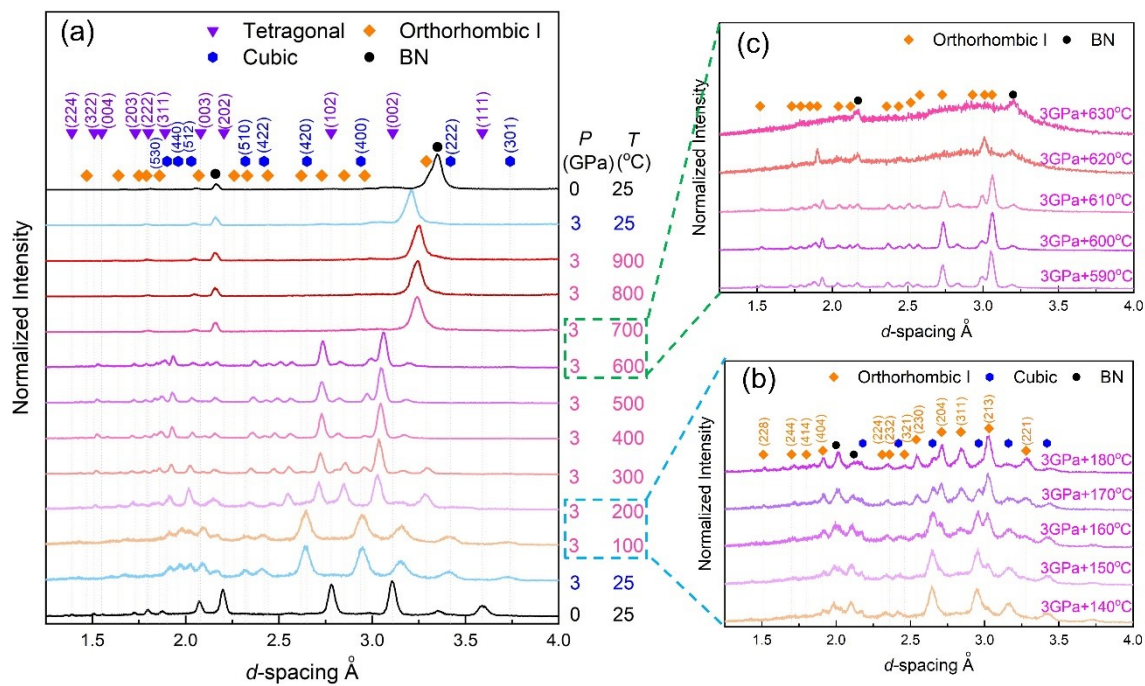

Fig. S2 X-ray profiles of  $\text{MASnI}_3$  under processing under high-pressure and high-temperature conditions. *In situ* X-ray acquisition was performed under applied pressure to 3 GPa, during heating to 900 °C and after cooling to room temperature. X-ray profiles before loading and after loading are also included.

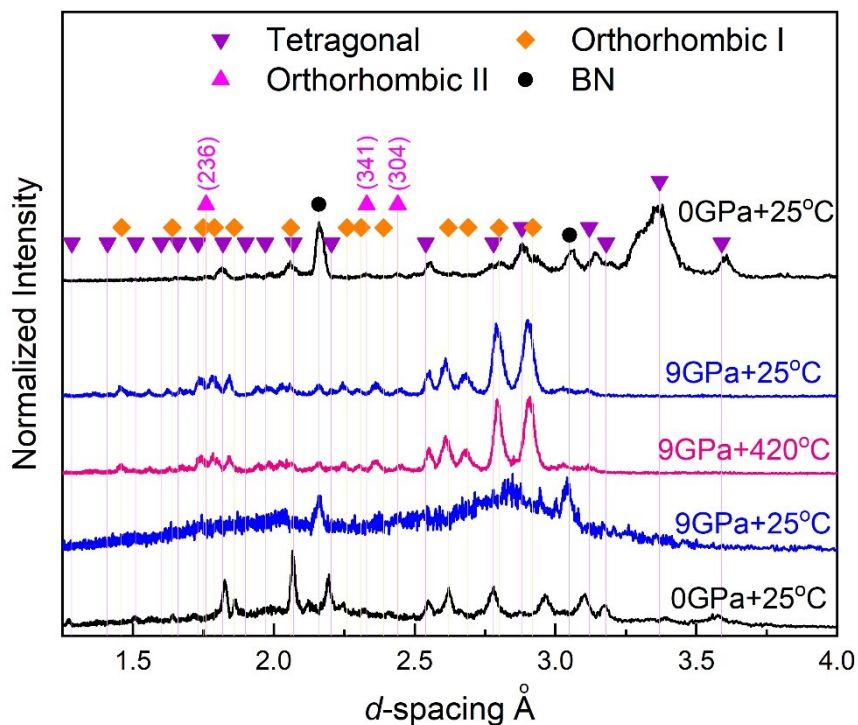

Fig. S3 X-ray profiles of MASnI<sub>3</sub> under processing under high-pressure and high-temperature conditions. *In situ* X-ray acquisition was performed under applied pressure to 9 GPa, during heating to 420 °C and after cooling to room temperature. X-ray profiles before loading and after loading are also included.
